# Supplementary material for: Lactucin reverses liver fibrosis by inhibiting TGF-β1/STAT3 signaling pathway and regulating short-chain fatty acids metabolism
Source: PubMed Central journal article supplement — Sci Rep. 2024 Aug 20;14:19323. doi: 10.1038/s41598-024-70253-5 (PMC11336071; doi:10.1038/s41598-024-70253-5), 2024-08-20

Figure 5

Repeat 1

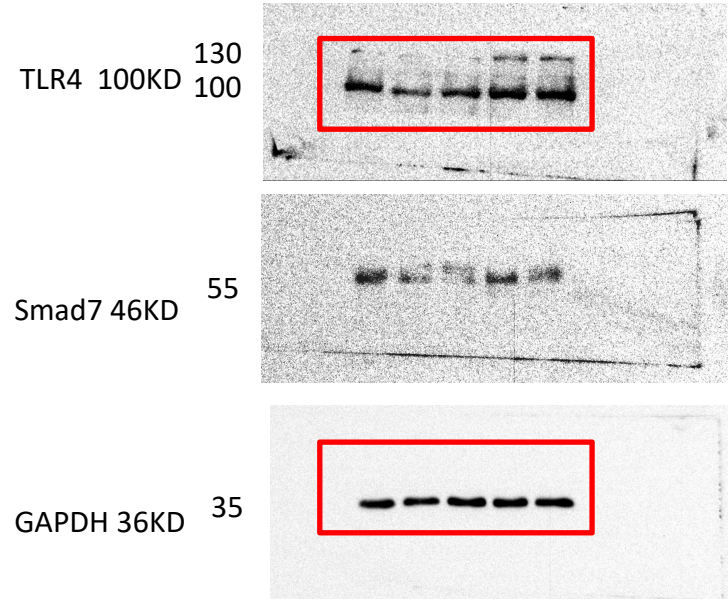

Repeat 2

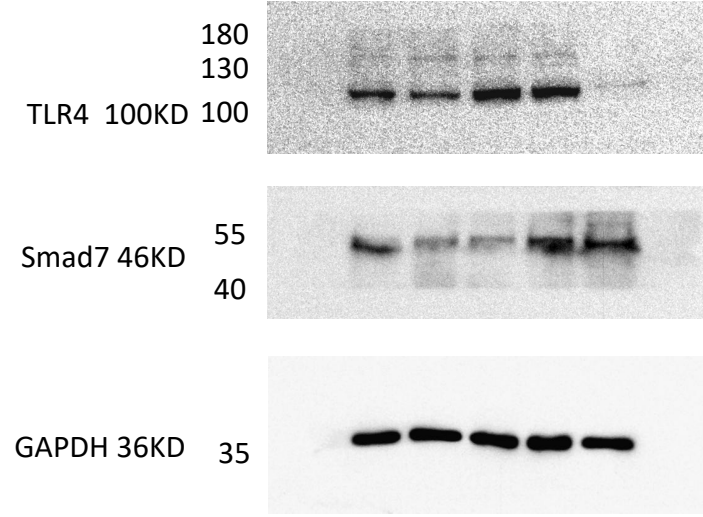

Repeat 3

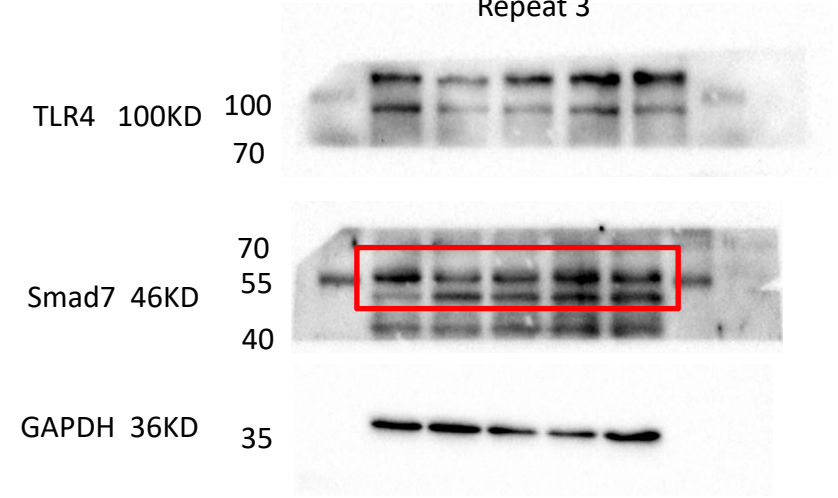

Repeat 1

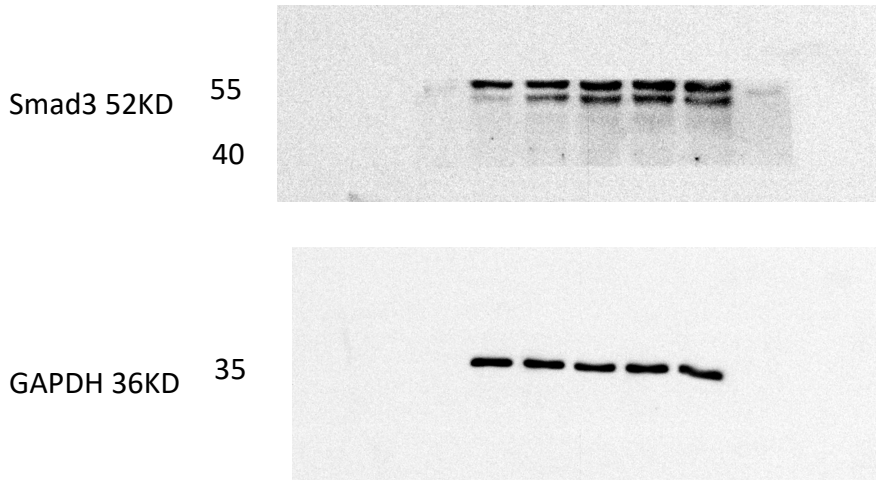

Repeat 2

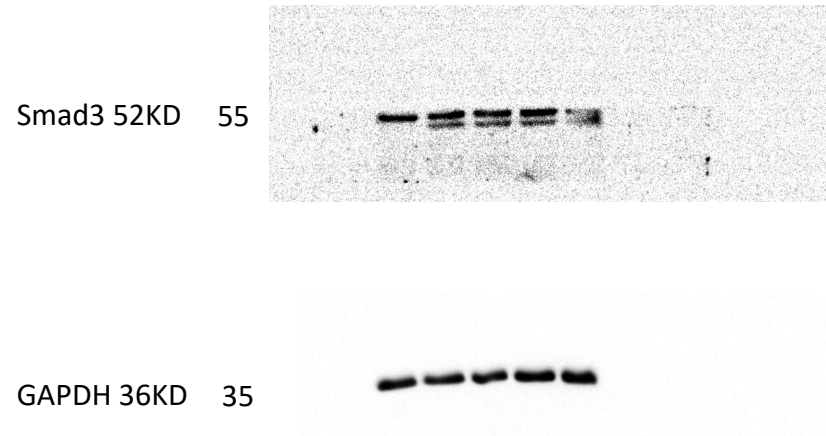

Repeat 3

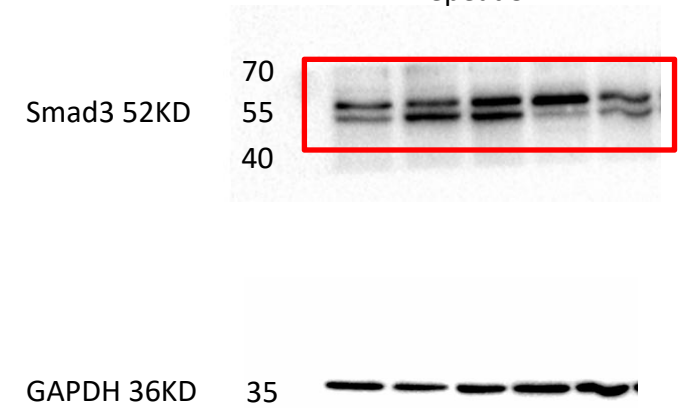

Figure 5

Repeat 1

$\alpha$ -sma 43KD

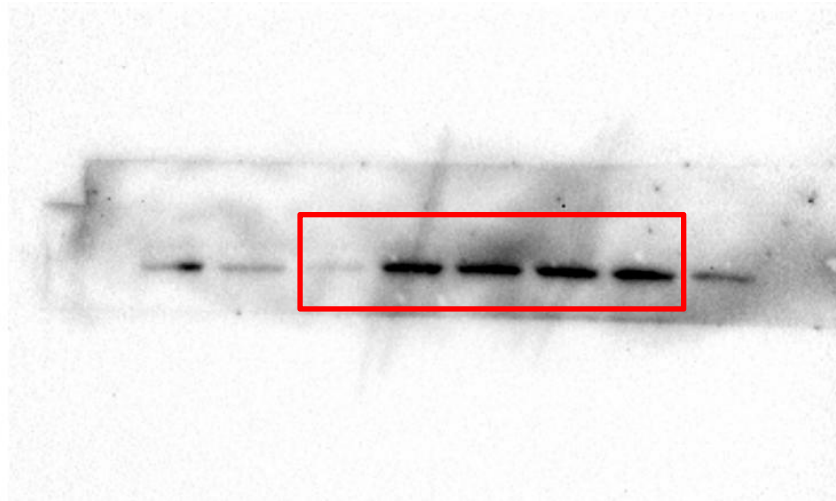

Repeat 2

$\alpha$ -sma 43KD

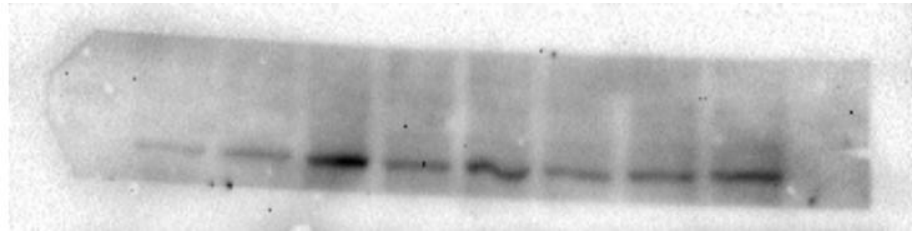

Repeat 3

$\alpha$ -sma 43KD

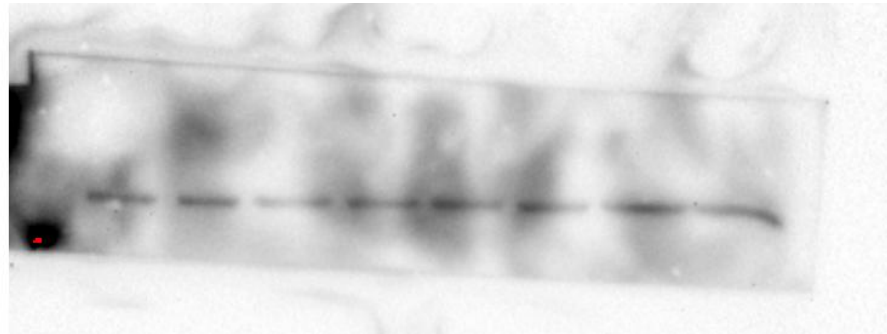

Figure 7

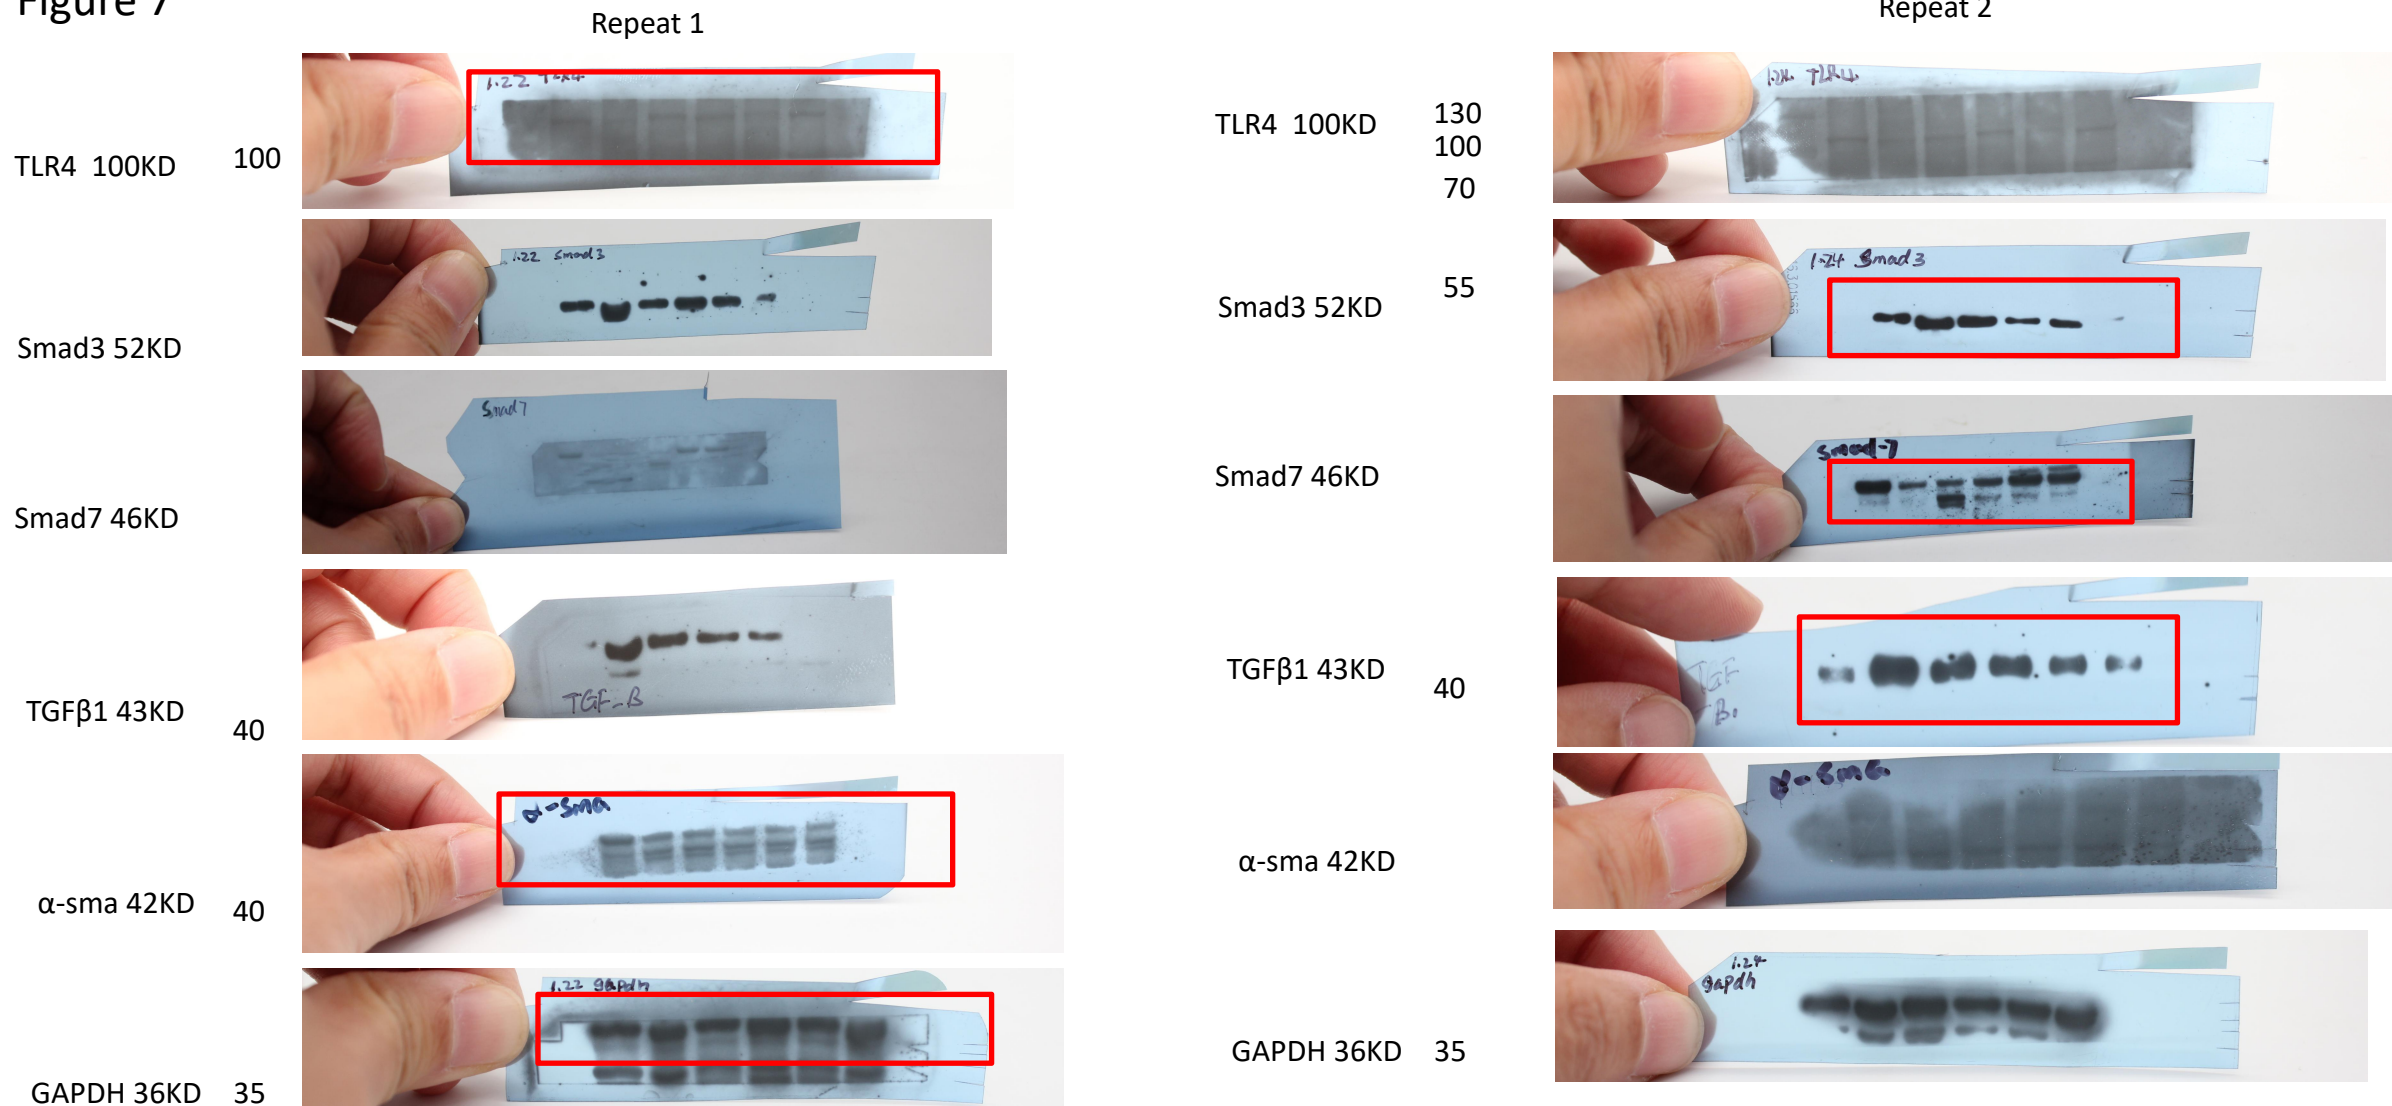

Figure 7

Repeat 3

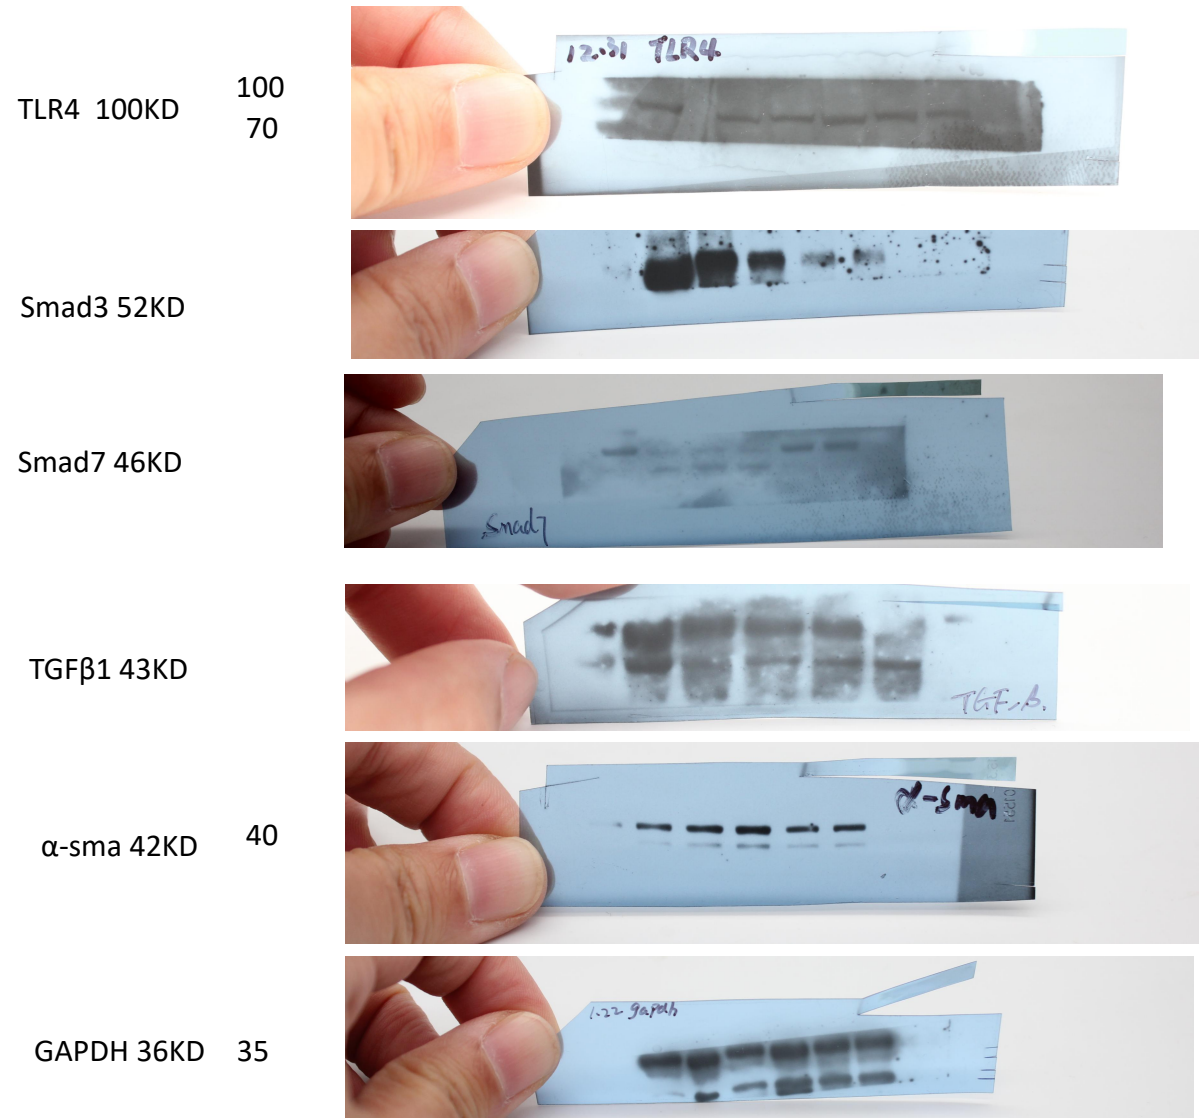

Figure 7

Repeat 1

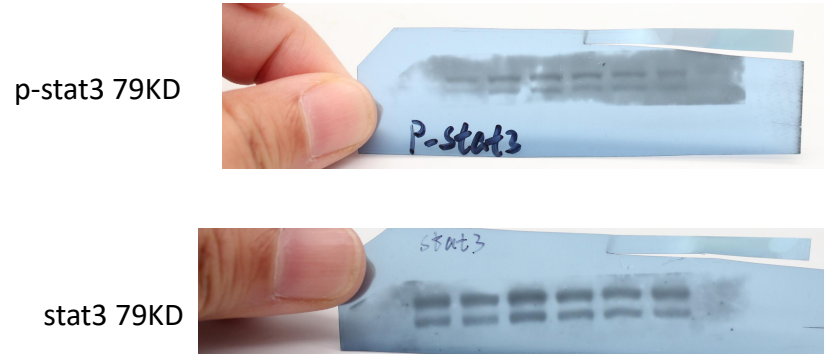

Repeat 2

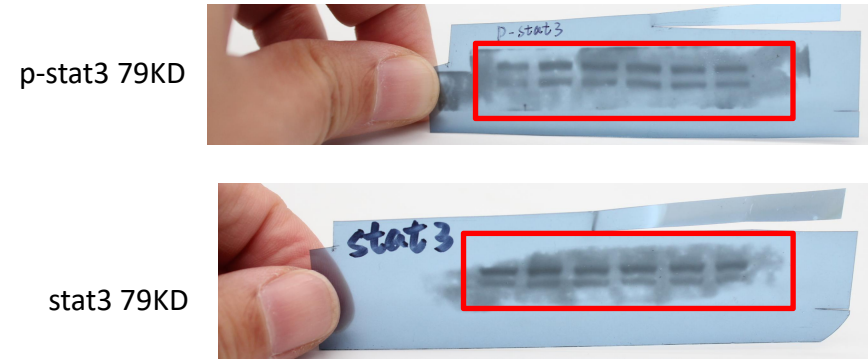

Repeat 3

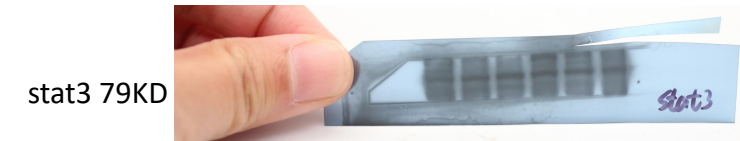

Supplement: 41598_2024_70253_MOESM5_ESM.pdf [file 41598_2024_70253_MOESM5_ESM.pdf]
